# Supplementary material
Source: HighWire-hosted journal article supplement (https://www.cmajopen.ca/highwire/filestream/87620/field_highwire_adjunct_files/0/open-2020-0300-original-submission.pdf)
Supplement: open-2020-0300-original-submission.pdf [file open-2020-0300-original-submission.pdf]

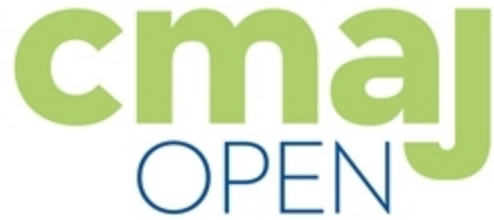

**Association of material deprivation with discharge location and length of stay after inpatient stroke rehabilitation: a retrospective, population-based cohort study.**

|                               |                                                                                                                                                                                                                                                                                                                                                                                                                                                                                                                                                                                                                                                                                                                                                                                                                                                                                                                                                                                                                                                                                                                                                                                                                                                                                                                                                                                                                                                                                  |
|-------------------------------|----------------------------------------------------------------------------------------------------------------------------------------------------------------------------------------------------------------------------------------------------------------------------------------------------------------------------------------------------------------------------------------------------------------------------------------------------------------------------------------------------------------------------------------------------------------------------------------------------------------------------------------------------------------------------------------------------------------------------------------------------------------------------------------------------------------------------------------------------------------------------------------------------------------------------------------------------------------------------------------------------------------------------------------------------------------------------------------------------------------------------------------------------------------------------------------------------------------------------------------------------------------------------------------------------------------------------------------------------------------------------------------------------------------------------------------------------------------------------------|
| Journal:                      | <i>CMAJ Open</i>                                                                                                                                                                                                                                                                                                                                                                                                                                                                                                                                                                                                                                                                                                                                                                                                                                                                                                                                                                                                                                                                                                                                                                                                                                                                                                                                                                                                                                                                 |
| Manuscript ID                 | CMAJOpen-2020-0300                                                                                                                                                                                                                                                                                                                                                                                                                                                                                                                                                                                                                                                                                                                                                                                                                                                                                                                                                                                                                                                                                                                                                                                                                                                                                                                                                                                                                                                               |
| Manuscript Type:              | Cohort (retrospective)                                                                                                                                                                                                                                                                                                                                                                                                                                                                                                                                                                                                                                                                                                                                                                                                                                                                                                                                                                                                                                                                                                                                                                                                                                                                                                                                                                                                                                                           |
| Date Submitted by the Author: | 29-Nov-2020                                                                                                                                                                                                                                                                                                                                                                                                                                                                                                                                                                                                                                                                                                                                                                                                                                                                                                                                                                                                                                                                                                                                                                                                                                                                                                                                                                                                                                                                      |
| Complete List of Authors:     | MacDonald, Shannon; Bridgepoint Active Healthcare; University of Toronto Faculty of Medicine, Physical Medicine & Rehabilitation Hall, Ruth; Institute for Clinical Evaluative Sciences<br>Bell, Chaim; Mount Sinai Hospital<br>Cronin, Shawna; University of Toronto Institute of Health Policy Management and Evaluation<br>Jaglal, Susan; University of Toronto, Physical Therapy                                                                                                                                                                                                                                                                                                                                                                                                                                                                                                                                                                                                                                                                                                                                                                                                                                                                                                                                                                                                                                                                                             |
| Keywords:                     | Health services research, Rehabilitation medicine                                                                                                                                                                                                                                                                                                                                                                                                                                                                                                                                                                                                                                                                                                                                                                                                                                                                                                                                                                                                                                                                                                                                                                                                                                                                                                                                                                                                                                |
| More Detailed Keywords:       | Outcome, Poverty, Rehabilitation, Social Class, Stroke                                                                                                                                                                                                                                                                                                                                                                                                                                                                                                                                                                                                                                                                                                                                                                                                                                                                                                                                                                                                                                                                                                                                                                                                                                                                                                                                                                                                                           |
| Abstract:                     | <p>Background: Low socioeconomic status is associated with increased risk of stroke and worse post-stroke functional status. The aim of this study was to determine whether socioeconomic status, measured by material deprivation, is associated with direct discharge to long-term care or length of stay following inpatient stroke rehabilitation.</p> <p>Methods: A retrospective, population-based cohort study of 18,736 individuals admitted to inpatient rehabilitation in Ontario, Canada after stroke was performed. Community-dwelling adults discharged from acute care with a most responsible diagnosis of stroke between September 1, 2012 and August 31, 2017 and subsequently admitted to an inpatient rehabilitation bed were included. A multivariable logistic regression was used to examine the association between material deprivation quintile and discharge to long-term care and a multivariable negative binomial regression was used to examine the association between material deprivation quintile and rehabilitation length of stay.</p> <p>Results: There was no association between material deprivation and direct discharge to long-term care (P=0.20); however, individuals living in the most deprived areas had a mean length of stay 1.7 days longer than those living in the least deprived areas (P=0.004). This difference remained significant after adjusting for other baseline differences (RR 1.03 [95% CI, 1.01 – 1.06]).</p> |

1  
2  
3  
4  
5  
6  
7  
8  
9  
10  
11  
12  
13  
14  
15  
16  
17  
18  
19  
20  
21  
22  
23  
24  
25  
26  
27  
28  
29  
30  
31  
32  
33  
34  
35  
36  
37  
38  
39  
40  
41  
42  
43  
44  
45  
46  
47  
48  
49  
50  
51  
52  
53  
54  
55  
56  
57  
58  
59  
60

|  |                                                                                                                                                                                   |
|--|-----------------------------------------------------------------------------------------------------------------------------------------------------------------------------------|
|  | Interpretation: Individuals living in deprived areas are not at a disadvantage in terms of discharge destination, but have a longer mean inpatient rehabilitation length of stay. |
|  |                                                                                                                                                                                   |

SCHOLARONE™  
Manuscripts

STROBE Statement—Checklist of items that should be included in reports of *cohort studies*

|                              | Item No | Recommendation                                                                                                                                                                                                                                                                                                         | Page No |
|------------------------------|---------|------------------------------------------------------------------------------------------------------------------------------------------------------------------------------------------------------------------------------------------------------------------------------------------------------------------------|---------|
| <b>Title and abstract</b>    | 1       | (a) Indicate the study's design with a commonly used term in the title or the abstract<br>(b) Provide in the abstract an informative and balanced summary of what was done and what was found                                                                                                                          | 0-1     |
| <b>Introduction</b>          |         |                                                                                                                                                                                                                                                                                                                        |         |
| Background/rationale         | 2       | Explain the scientific background and rationale for the investigation being reported                                                                                                                                                                                                                                   | 2       |
| Objectives                   | 3       | State specific objectives, including any prespecified hypotheses                                                                                                                                                                                                                                                       | 2       |
| <b>Methods</b>               |         |                                                                                                                                                                                                                                                                                                                        |         |
| Study design                 | 4       | Present key elements of study design early in the paper                                                                                                                                                                                                                                                                | 3       |
| Setting                      | 5       | Describe the setting, locations, and relevant dates, including periods of recruitment, exposure, follow-up, and data collection                                                                                                                                                                                        | 3       |
| Participants                 | 6       | (a) Give the eligibility criteria, and the sources and methods of selection of participants. Describe methods of follow-up<br>(b) For matched studies, give matching criteria and number of exposed and unexposed                                                                                                      | 3-4     |
| Variables                    | 7       | Clearly define all outcomes, exposures, predictors, potential confounders, and effect modifiers. Give diagnostic criteria, if applicable                                                                                                                                                                               | 4-5     |
| Data sources/<br>measurement | 8*      | For each variable of interest, give sources of data and details of methods of assessment (measurement). Describe comparability of assessment methods if there is more than one group                                                                                                                                   | 3-5     |
| Bias                         | 9       | Describe any efforts to address potential sources of bias                                                                                                                                                                                                                                                              |         |
| Study size                   | 10      | Explain how the study size was arrived at                                                                                                                                                                                                                                                                              | 3       |
| Quantitative variables       | 11      | Explain how quantitative variables were handled in the analyses. If applicable, describe which groupings were chosen and why                                                                                                                                                                                           | 4-5     |
| Statistical methods          | 12      | (a) Describe all statistical methods, including those used to control for confounding<br>(b) Describe any methods used to examine subgroups and interactions<br>(c) Explain how missing data were addressed<br>(d) If applicable, explain how loss to follow-up was addressed<br>(e) Describe any sensitivity analyses | 5       |
| <b>Results</b>               |         |                                                                                                                                                                                                                                                                                                                        |         |
| Participants                 | 13*     | (a) Report numbers of individuals at each stage of study—eg numbers potentially eligible, examined for eligibility, confirmed eligible, included in the study, completing follow-up, and analysed<br>(b) Give reasons for non-participation at each stage<br>(c) Consider use of a flow diagram                        | 6       |
| Descriptive data             | 14*     | (a) Give characteristics of study participants (eg demographic, clinical, social) and information on exposures and potential confounders<br>(b) Indicate number of participants with missing data for each variable of interest<br>(c) Summarise follow-up time (eg, average and total amount)                         | 6       |
| Outcome data                 | 15*     | Report numbers of outcome events or summary measures over time                                                                                                                                                                                                                                                         |         |

|    |                          |    |                                                                                                                                                                                                              |      |
|----|--------------------------|----|--------------------------------------------------------------------------------------------------------------------------------------------------------------------------------------------------------------|------|
| 1  | Main results             | 16 | (a) Give unadjusted estimates and, if applicable, confounder-adjusted estimates and their precision (eg, 95% confidence interval). Make clear which confounders were adjusted for and why they were included | 6-7  |
| 2  |                          |    |                                                                                                                                                                                                              |      |
| 3  |                          |    | (b) Report category boundaries when continuous variables were categorized                                                                                                                                    |      |
| 4  |                          |    | (c) If relevant, consider translating estimates of relative risk into absolute risk for a meaningful time period                                                                                             |      |
| 5  | Other analyses           | 17 | Report other analyses done—eg analyses of subgroups and interactions, and sensitivity analyses                                                                                                               |      |
| 6  |                          |    |                                                                                                                                                                                                              |      |
| 7  |                          |    |                                                                                                                                                                                                              |      |
| 8  |                          |    |                                                                                                                                                                                                              |      |
| 9  |                          |    |                                                                                                                                                                                                              |      |
| 10 |                          |    |                                                                                                                                                                                                              |      |
| 11 | <b>Discussion</b>        |    |                                                                                                                                                                                                              |      |
| 12 | Key results              | 18 | Summarise key results with reference to study objectives                                                                                                                                                     | 7    |
| 13 | Limitations              | 19 | Discuss limitations of the study, taking into account sources of potential bias or imprecision. Discuss both direction and magnitude of any potential bias                                                   | 9-10 |
| 14 |                          |    |                                                                                                                                                                                                              |      |
| 15 | Interpretation           | 20 | Give a cautious overall interpretation of results considering objectives, limitations, multiplicity of analyses, results from similar studies, and other relevant evidence                                   | 10   |
| 16 |                          |    |                                                                                                                                                                                                              |      |
| 17 | Generalisability         | 21 | Discuss the generalisability (external validity) of the study results                                                                                                                                        | 10   |
| 18 |                          |    |                                                                                                                                                                                                              |      |
| 19 |                          |    |                                                                                                                                                                                                              |      |
| 20 |                          |    |                                                                                                                                                                                                              |      |
| 21 | <b>Other information</b> |    |                                                                                                                                                                                                              |      |
| 22 | Funding                  | 22 | Give the source of funding and the role of the funders for the present study and, if applicable, for the original study on which the present article is based                                                | 10   |
| 23 |                          |    |                                                                                                                                                                                                              |      |
| 24 |                          |    |                                                                                                                                                                                                              |      |

25  
26 \*Give information separately for exposed and unexposed groups.

27  
28 **Note:** An Explanation and Elaboration article discusses each checklist item and gives methodological background and  
29 published examples of transparent reporting. The STROBE checklist is best used in conjunction with this article (freely  
30 available on the Web sites of PLoS Medicine at <http://www.plosmedicine.org/>, Annals of Internal Medicine at  
31 <http://www.annals.org/>, and Epidemiology at <http://www.epidem.com/>). Information on the STROBE Initiative is  
32 available at <http://www.strobe-statement.org>.  
33  
34  
35  
36  
37  
38  
39  
40  
41  
42  
43  
44  
45  
46  
47  
48  
49  
50  
51  
52  
53  
54  
55  
56  
57  
58  
59  
60

1  
2  
3  
4 1 **Association of material deprivation with discharge location and length of stay after**  
5  
6 2 **inpatient stroke rehabilitation: a retrospective, population-based cohort study.**  
7  
8  
9 3

10  
11 4 Shannon L. MacDonald<sup>1,2,3</sup> MD, MSc; Ruth E. Hall<sup>2,4,5</sup> PhD; Chaim M. Bell<sup>1,2,3,4</sup> MD, PhD;  
12  
13 5 Shawna Cronin<sup>2,6</sup>; and Susan B. Jaglal<sup>2,4,6,7</sup> PhD  
14  
15  
16 6

17  
18 7 <sup>1</sup> Department of Medicine, University of Toronto, Toronto, Canada  
19

20 8 <sup>2</sup> Institute of Health Policy, Management and Evaluation, University of Toronto, Toronto,  
21  
22 9 Canada  
23

24  
25 10 <sup>3</sup> Sinai Health, Toronto, Canada  
26

27 11 <sup>4</sup> ICES, Toronto, Canada  
28

29 12 <sup>5</sup> Institute for Better Health, Trillium Health Partners, Mississauga, Canada  
30

31 13 <sup>6</sup> Toronto Rehabilitation Institute - University Health Network, Toronto, Canada  
32  
33

34 14 <sup>7</sup> Department of Physical Therapy, University of Toronto, Toronto, Canada  
35  
36  
37 15

38  
39 16 **Corresponding author:**

40  
41 17 Shannon MacDonald, Bridgepoint Active Healthcare, Sinai Health, Room G178, 1 Bridgepoint  
42  
43 18 Drive, Toronto, ON, Canada, M4M 2B5, shannon.macdonald@mail.utoronto.ca  
44  
45  
46 19

47  
48 20 **Key Words:** Outcome, Poverty, Rehabilitation, Social Class, Stroke  
49  
50  
51 21  
52  
53  
54 22  
55  
56  
57  
58  
59  
60

1  
2  
3 **23 Abstract**  
4  
5

6 **24 Background:** Low socioeconomic status is associated with increased risk of stroke and worse  
7  
8  
9 **25** post-stroke functional status. The aim of this study was to determine whether socioeconomic  
10  
11 **26** status, measured by material deprivation, is associated with direct discharge to long-term care or  
12  
13 **27** length of stay following inpatient stroke rehabilitation.  
14  
15

16  
17 **28 Methods:** A retrospective, population-based cohort study of 18,736 individuals admitted to  
18  
19 **29** inpatient rehabilitation in Ontario, Canada after stroke was performed. Community-dwelling  
20  
21 **30** adults discharged from acute care with a most responsible diagnosis of stroke between  
22  
23 **31** September 1, 2012 and August 31, 2017 and subsequently admitted to an inpatient rehabilitation  
24  
25 **32** bed were included. A multivariable logistic regression was used to examine the association  
26  
27 **33** between material deprivation quintile and discharge to long-term care and a multivariable  
28  
29 **34** negative binomial regression was used to examine the association between material deprivation  
30  
31 **35** quintile and rehabilitation length of stay.  
32  
33  
34  
35

36 **36 Results:** There was no association between material deprivation and direct discharge to long-  
37  
38 **37** term care (P=0.20); however, individuals living in the most deprived areas had a mean length of  
39  
40 **38** stay 1.7 days longer than those living in the least deprived areas (P=0.004). This difference  
41  
42 **39** remained significant after adjusting for other baseline differences (RR 1.03 [95% CI, 1.01 –  
43  
44 **40** 1.06]).  
45  
46  
47

48 **41 Interpretation:** Individuals living in deprived areas are not at a disadvantage in terms of  
49  
50  
51 **42** discharge destination, but have a longer mean inpatient rehabilitation length of stay.  
52  
53

54 **43**  
55  
56  
57  
58  
59  
60

## 44 Introduction

45 Stroke is a significant cause of disability in Canada and around the world.<sup>1</sup> Although inpatient  
46 rehabilitation is essential to an individual's recovery and functional improvement after stroke,<sup>2,3</sup>  
47 some patients will continue to have significant impairments at the time of discharge. In our  
48 region, approximately 3.5% of individuals undergoing inpatient rehabilitation for stroke are  
49 directly discharged to long-term care.<sup>4</sup> Given that long-term care facilities have high occupancy  
50 rates<sup>5</sup> with waitlists ranging from months to years,<sup>6</sup> this may result in a prolonged length of stay  
51 and a decreased capacity to admit new patients to inpatient rehabilitation. Furthermore, returning  
52 home is a common patient-identified goal.<sup>7</sup>

53  
54 A 2015 review of the literature, which included several international studies, reported an  
55 association between low socioeconomic status and increased risk of stroke, having more severe  
56 strokes, and worse post-stroke functional status.<sup>8</sup> However, the role of socioeconomic status on  
57 discharge destination, particularly to long-term care, after inpatient stroke rehabilitation is  
58 unclear.<sup>9</sup> In order to facilitate a safe discharge home, some patients may require home  
59 modifications, the purchase of equipment, or private supports to supplement the often limited  
60 government-funded home care services.<sup>10</sup> As a result, one might postulate that socioeconomic  
61 status impacts choice of discharge destination following inpatient rehabilitation.

62  
63 The aim of this study was to determine whether neighborhood material deprivation is associated  
64 with (i) direct discharge to long-term care following inpatient rehabilitation for stroke and (ii)  
65 increased rehabilitation length of stay.

66

1  
2  
3 **67 Methods**

4  
5 *68 Study Design*

6  
7  
8 *69* This was a retrospective, population-based cohort study of community-dwelling adults in  
9  
10 *70* Ontario, Canada, who were admitted to inpatient rehabilitation after stroke.

11  
12 *71*

13  
14  
15 *72 Data Sources and Cohort Selection*

16  
17 *73* Study data were obtained from the multiple datasets at ICES. ICES is an independent, non-profit  
18  
19 *74* research institute whose legal status under Ontario's health information privacy law allows it to  
20  
21 *75* collect and analyze health care and demographic data, without consent, for health system  
22  
23 *76* evaluation and improvement.

24  
25  
26 *77*

27  
28 *78* The Registered Persons Database and Ontario Marginalization Index database were used for  
29  
30 *79* sociodemographic information, the Discharge Abstract Database for comorbidity and acute care  
31  
32 *80* data, and the National Rehabilitation Reporting System for rehabilitation information, including  
33  
34 *81* pre- and post-stroke living setting and arrangement. These datasets were linked using unique  
35  
36 *82* encoded identifiers and analyzed at ICES.

37  
38  
39  
40 *83*

41  
42 *84* We included Ontario residents who were discharged from an acute care hospital with a most  
43  
44 *85* responsible diagnosis of ischemic or hemorrhagic stroke (International Classification of  
45  
46 *86* Diseases-10 I63, I64, I60 and I61) between September 1, 2012 and August 31, 2017 who were  
47  
48 *87* subsequently admitted to an inpatient rehabilitation bed within +/- 3 days with the rehabilitation  
49  
50 *88* client group code 1 (stroke). We restricted the cohort to individuals previously living at home  
51  
52 *89* (with or without supports), age 19-100 years inclusive, who had an inpatient rehabilitation length  
53  
54  
55  
56  
57  
58  
59  
60



1  
2  
3 90 of stay greater than three days and less than the 99<sup>th</sup> percentile. Individuals with missing material  
4  
5 91 deprivation data were excluded.  
6  
7

8 92

9  
10 93 *Exposure and Outcomes*

11  
12 94 Our primary exposure was material deprivation.<sup>11</sup> Material deprivation is one of four dimensions  
13  
14 95 of the Ontario Marginalization Index, a derived ecological-based index that captures differences  
15  
16 96 in marginalization across the province of Ontario.<sup>11, 12</sup> For our observation period, the Ontario  
17  
18 97 Marginalization Index was primarily created using dissemination area data, representing a  
19  
20 98 population of 400-700 persons, from the 2011 and 2016 censuses.<sup>11</sup> The material deprivation  
21  
22 99 dimension indicators include education level, ratio of income from government payments, as  
23  
24 100 well as the proportion of the population who are lone parent families, unemployed, low-income,  
25  
26 101 and living in homes in need of major repair.<sup>11</sup> Geographic units are divided into quintiles with  
27  
28 102 quintile 1 representing the least marginalized 20% of areas in Ontario and quintile 5 representing  
29  
30 103 the most marginalized areas.<sup>11</sup>  
31  
32  
33  
34  
35  
36  
37

38 105 The primary outcome was the proportion of individuals discharged from rehabilitation to long-  
39  
40 106 term care. Discharge destination was recorded and categorized as home with health services,  
41  
42 107 home without health services, assisted living, long-term care, acute care, and other / unknown  
43  
44 108 (boarding house, shelter, public place, or unknown). The primary outcome, discharge  
45  
46 109 destination, was then reduced to a binary variable – discharge to long-term care (yes/no). The  
47  
48 110 secondary outcome was inpatient rehabilitation length of stay, defined as inpatient rehabilitation  
49  
50 111 discharge date minus admission date.  
51  
52  
53

54 112  
55  
56  
57  
58  
59  
60

1  
2  
3 113 *Covariates*  
4

5 114 Potential covariates included age, rurality (rural community = population  $\leq 10\,000$ ), Charlson  
6  
7 115 Comorbidity Index  $\geq 2$ ,<sup>13, 14</sup> history of atrial fibrillation,<sup>15</sup> whether the patient received tissue  
8  
9 116 plasminogen activator or was treated on an acute stroke unit, acute care length of stay, pre-stroke  
10  
11 117 living arrangement (alone or not alone), admission Functional Independence Measure score,  
12  
13 118 whether the rehabilitation program was suspended due to a change in medical status (service  
14  
15 119 interruption) or whether the patient was re-admitted to acute care (discharge from and re-  
16  
17 120 admitted to an inpatient rehabilitation bed within 30 days).  
18  
19  
20  
21

22 121  
23  
24 122 *Statistical Analysis*  
25

26 123 Means and standard deviations were calculated for continuous variables and frequencies and  
27  
28 124 proportions for categorical variables. We analyzed between group differences using a one-way  
29  
30 125 ANOVA for continuous variables and a Pearson's chi square test for categorical data. Variables  
31  
32 126 were screened for collinearity defined as a tolerance  $< 0.25$ . Co-variables for each model were  
33  
34 127 selected using bivariate screening. Variables with a p-value  $< 0.05$  were included in the  
35  
36 128 multivariable models. A multivariable logistic regression was used to examine the association  
37  
38 129 between material deprivation and discharge to long-term care and a multivariable negative  
39  
40 130 binomial regression was used to examine the association between material deprivation and  
41  
42 131 rehabilitation length of stay.  
43  
44  
45  
46

47 132  
48  
49 133 Statistical tests were 2-tailed. A p-value of  $< 0.05$  was considered statistically significant.  
50  
51 134 Statistical analyses were performed using SAS Enterprise Guide statistical software, version 7.1  
52  
53 135 (SAS Institute) in a UNIX environment.  
54  
55  
56  
57  
58  
59  
60

1  
2  
3 1364  
5 137 *Ethics Approval*

6  
7 138 The use of data in this project was authorized under section 45 of Ontario's Personal Health  
8  
9 139 Information Protection Act, which does not require additional review by a Research Ethics  
10  
11  
12 140 Board.

13  
14  
15 14116  
17 142 **Results**

18  
19 143 A total of 18,736 individuals met our inclusion criteria and were included in the analysis. The  
20  
21 144 number of individuals in each quintile increased as material deprivation increased (least deprived  
22  
23 145 n = 3,068, most deprived n=4,582; Table 1). Individuals living in the most deprived areas were  
24  
25 146 younger (age 19-49, least deprived 5.9%, most deprived 7.3%; age 90+, least deprived 6.6%,  
26  
27 147 most deprived 5.0%; P<0.001); had more co-morbidities (Charlson Comorbidity Index  $\geq 2$ ; least  
28  
29 148 deprived 53.8%, most deprived 60.5%; P<0.001), but less atrial fibrillation (least deprived  
30  
31 149 15.6%, most deprived 12.0%; P<0.001); were more often living alone prior to their stroke (least  
32  
33 150 deprived 24.0%, most deprived 34.9%; P<0.001); and were less frequently treated with tissue  
34  
35 151 plasminogen activator (least deprived 15.8%, most deprived 13.8%; P=0.011) or on a stroke unit  
36  
37 152 (least deprived 49.2%, most deprived 46.9%; P=0.026). Admission Functional Independence  
38  
39 153 Measure scores were similar across deprivation quintiles.

40  
41  
42  
43  
44  
45 15446  
47 155 *Outcomes*

48  
49 156 As shown in Tables 2 and 4, there was no association between material deprivation and direct  
50  
51 157 discharge to long-term care. However, when we examined all possible discharge destinations,

1  
2  
3 158 individuals living in the most deprived areas were less frequently discharged to assisted living  
4  
5 159 (4.9% vs 6.8%;  $P=0.001$ ) compared to the least deprived group (Table 3).  
6  
7

8 160

9  
10 161 Although the median length of stay was the same across deprivation quintiles, mean length of  
11  
12 162 stay increased as material deprivation increased ( $P=0.004$ ). Individuals living in the most  
13  
14 163 deprived areas had a mean length of stay 1.7 days longer than those living in the least deprived  
15  
16  
17 164 areas. In the adjusted model, being in the most deprived group was associated with a statistically  
18  
19 165 significant longer length of stay compared to the least deprived group (RR 1.03 [95% CI, 1.01 –  
20  
21 166 1.06]; Table 5).  
22  
23

24 167

## 25 26 168 **Interpretation**

27  
28 169 The objectives of this study were to determine whether (i) material deprivation is associated with  
29  
30  
31 170 direct discharge to long-term care following inpatient rehabilitation for stroke and (ii) whether  
32  
33 171 there is an association between material deprivation and inpatient rehabilitation length of stay.  
34  
35 172 Our study demonstrated that there is no association between material deprivation and direct  
36  
37 173 discharge to long-term care following inpatient stroke rehabilitation. However, individuals living  
38  
39 174 in the most deprived areas had a mean length of stay 1.7 days longer than persons in the least  
40  
41  
42 175 deprived areas. To the best of our knowledge, this is the first population-based study to examine  
43  
44 176 the association between material deprivation as a measure of socioeconomic status and direct  
45  
46  
47 177 discharge to long-term care and length of stay after inpatient rehabilitation for stroke.  
48

49 178

50  
51 179 In the acute care setting, studies examining the association between socioeconomic status and  
52  
53 180 discharge destination after stroke have provided mixed results.<sup>16-21</sup> Notably, studies in the United  
54  
55  
56  
57  
58  
59  
60

1  
2  
3 181 States have demonstrated that individuals of lower socioeconomic status are less frequently  
4  
5 182 discharged to inpatient rehabilitation and more frequently transferred to skilled nursing  
6  
7 183 facilities.<sup>19, 22, 23</sup> Compared to inpatient rehabilitation facilities, skilled nursing facilities typically  
8  
9 184 provide fewer hours of therapy per week and have less specialized staff, a longer length of stay  
10  
11 185 (average length of stay 32 vs 15 days), and fewer regulations, which results in lower-cost care.<sup>24,</sup>  
12  
13 186 <sup>25</sup> Admission to skilled nursing facilities does not result in the same degree of patient functional  
14  
15 187 improvements as inpatient rehabilitation hospitals.<sup>26</sup> In comparison, a 2013 Canadian study  
16  
17 188 examined 11,050 individuals admitted to acute care with ischemic stroke or transient ischemic  
18  
19 189 attack and found no association between neighborhood income quintile and rate of discharge to  
20  
21 190 inpatient rehabilitation. <sup>21</sup>

22  
23  
24  
25  
26 191  
27  
28 192 In a universal health care system where inpatient rehabilitation is well resourced, it is possible  
29  
30 193 that socioeconomic status has minimal impact on final discharge destination. Similar to our  
31  
32 194 study, an Australian study found no association between the Index of Economic Resources, a  
33  
34 195 measure of income and economic wealth, and discharge destination following inpatient  
35  
36 196 rehabilitation.<sup>27</sup> In contrast, Nguyen et al.,<sup>28</sup> in the United States, demonstrated that individuals  
37  
38 197 with Medicare, compared to private health insurance, were more likely to be discharged to a  
39  
40 198 skilled nursing facility as opposed to home following inpatient acute care rehabilitation. The  
41  
42 199 need for further institutionalization following their inpatient rehabilitation stay was considered a  
43  
44 200 negative outcome.

45  
46  
47 201  
48  
49 202 Although material deprivation was not associated with direct discharge to long-term care in our  
50  
51 203 study, there were subtle differences in final discharge destination across deprivation quintiles.  
52  
53  
54  
55  
56  
57  
58  
59  
60

1  
2  
3 204 The frequency of discharge to assisted living increased as deprivation quintile decreased (least  
4  
5 205 deprived 6.8%, most deprived 4.9%). In Canada, assisted living facilities typically provide  
6  
7 206 services such as meals, housekeeping, laundry, and some degree of personal assistance; however,  
8  
9  
10 207 unlike long-term care, the cost of assisted living is typically paid for by the resident.<sup>5</sup> There was  
11  
12 208 no difference in the frequency of discharge home with or without health services across quintiles.  
13

14 209  
15  
16  
17 210 The association of socioeconomic status on length of stay may be influenced by health care  
18  
19 211 funding and insurance for hospital care. A study from Singapore, where rehabilitation is not fully  
20  
21 212 publicly funded, demonstrated that patients in partially-subsidized beds (versus beds fully paid  
22  
23 213 for by the patient) had a shorter length of stay, which the authors felt was at least partially a  
24  
25 214 reflection of the ability of patients and families to pay for the balance.<sup>29</sup> In our study, length of  
26  
27 215 stay increased as deprivation quintile increased. However, this increase was partially accounted  
28  
29 216 for by other baseline factors (e.g. living alone pre-stroke and greater comorbidity). Nevertheless,  
30  
31 217 given that the cost of an inpatient rehabilitation bed after stroke is over \$600 CDN / day,<sup>30</sup> it is  
32  
33 218 important to understand the key drivers of increased length of stay for individuals living in the  
34  
35 219 most deprived areas. Future studies could consider exploring whether English language  
36  
37 220 proficiency;<sup>31</sup> barriers to caregiver training, such as transportation and time;<sup>32</sup> and health  
38  
39 221 literacy<sup>33</sup> are potential drivers of increased length of stay in this population.  
40  
41  
42  
43  
44  
45  
46

### 47 223 *Limitations*

48  
49 224 Although we used a well-described explanatory variable shown to be associated with worse  
50  
51 225 health outcomes,<sup>12</sup> the index has limitations. The Ontario Marginalization Index is an ecological,  
52  
53 226 not individual, measure of socioeconomic status and is prone to possible ecological fallacy; a  
54  
55  
56  
57  
58  
59  
60

1  
2  
3 227 person's deprivation quintile based on their location of residence may not reflect their individual  
4  
5 228 socioeconomic status.<sup>34, 35</sup> Although relationships described using ecological measures and  
6  
7 229 individual-level indicators are often consistent, it is important to note that our results reflect  
8  
9 230 associations with living in a deprived area, not individual socioeconomic status.<sup>35</sup> Furthermore,  
10  
11 231 our study examined persons who were admitted to inpatient rehabilitation and was not designed  
12  
13 232 to examine potential associations between material deprivation and acceptance to inpatient  
14  
15 233 rehabilitation from acute care. Finally, given differences in health care system funding, the  
16  
17 234 applicability of our findings to other settings, particularly those without universal publicly  
18  
19 235 funded hospital care is unclear.  
20  
21  
22  
23  
24  
25

### 26 237 *Conclusion*

27  
28 238 Individuals undergoing inpatient rehabilitation after stroke with low socioeconomic status, as  
29  
30 239 measured by material deprivation, are not at a disadvantage in terms of discharge destination, but  
31  
32 240 have longer mean inpatient rehabilitation lengths of stay.  
33  
34  
35  
36  
37

### 38 242 **Funding**

39  
40 243 Shannon MacDonald received funding from the Dr. Eliot A. Phillipson Sinai Health Department  
41  
42 244 of Medicine Fellowship. Susan Jaglal holds the Toronto Rehabilitation Institute Chair at the  
43  
44 245 University of Toronto.  
45  
46  
47  
48

### 49 247 **Conflicts-of-Interest / Disclosures**

50  
51 248 This study was supported by ICES, which is funded by an annual grant from the Ontario  
52  
53 249 Ministry of Health and Long-Term Care (MOHLTC). The opinions, results and conclusions  
54  
55  
56  
57  
58  
59  
60

1  
2  
3 250 reported in this paper are those of the authors and are independent from the funding and data  
4  
5 251 sources. No endorsement by ICES or the Ontario MOHLTC is intended or should be inferred.  
6  
7  
8 252 Parts of this material are based on data and/or information compiled and provided by  
9  
10 253 CIHI. However, the analyses, conclusions, opinions and statements expressed in the material are  
11  
12 254 those of the author(s), and not necessarily those of CIHI.  
13  
14  
15 255

### 16 17 256 **Data Availability**

18  
19 257 The dataset from this study is held securely in coded form at ICES. While data sharing  
20  
21 258 agreements prohibit ICES from making the dataset publicly available, access may be granted to  
22  
23  
24 259 those who meet pre-specified criteria for confidential access.  
25  
26  
27  
28  
29  
30  
31  
32  
33  
34  
35  
36  
37  
38  
39  
40  
41  
42  
43  
44  
45  
46  
47  
48  
49  
50  
51  
52  
53  
54  
55  
56  
57  
58  
59  
60



## References

1. Feigin VL, Norrving B and Mensah GA. Global burden of stroke. *Circ Res* 2017; 120: 439-448.
2. Rønning OM and Guldvog B. Outcome of subacute stroke rehabilitation: a randomized controlled trial. *Stroke* 1998; 29: 779-784.
3. Juby LC, Lincoln NB and Berman P. The effect of a stroke rehabilitation unit on functional and psychological outcome: a randomised controlled trial. *Cerebrovasc Dis* 1996; 6: 106-110.
4. Hall RE, French E, Khan F, et al. Ontario stroke evaluation report 2016: a focus on stroke rehabilitation. Toronto, ON: Institute for Clinical Evaluative Sciences, <https://www.ices.on.ca/flip-publication/Ontario-Stroke-Evaluation-Report-2016/files/assets/common/downloads/publication.pdf> (2016, accessed November 8, 2020).
5. Roblin B, Deber R, Kuluski K, et al. Ontario's retirement homes and long-term care homes: a comparison of care services and funding regimes. *Can J Aging* 2019; 38: 155-167.
6. Toronto Central LHIN. Information on long-term care homes, <http://healthcareathome.ca/torontocentral/en/care/Documents/Toronto%20Central%20LTC%20Wait%20List%20Nov%202018.pdf> (2018, accessed December 9, 2018).
7. Kus S, Muller M, Strobl R, et al. Patient goals in post-acute geriatric rehabilitation--goal attainment is an indicator for improved functioning. *J Rehabil Med* 2011; 43: 156-161.
8. Marshall IJ, Wang Y, Crichton S, et al. The effects of socioeconomic status on stroke risk and outcomes. *Lancet Neurol* 2015; 14: 1206-1218.

- 1  
2  
3 9. Burton JK, Ferguson EEC, Barugh AJ, et al. Predicting discharge to institutional long-  
4 term care after stroke: a systematic review and metaanalysis. *J Am Geriatr Soc* 2018; 66: 161-  
5 169.  
6  
7
- 8  
9  
10 10. Yakerson A. Home care in Ontario: perspectives on equity. *Int J Health Serv* 2019; 49:  
11 260-272.  
12
- 13  
14 11. Matheson FI and Ontario Agency for Health Protection and Promotion (Public Health  
15 Ontario). 2011 Ontario Marginalization Index: user guide, [https://www.publichealthontario.ca/-](https://www.publichealthontario.ca/-/media/documents/O/2017/on-marg-user-2011.pdf?la=en)  
16 [/media/documents/O/2017/on-marg-user-2011.pdf?la=en](https://www.publichealthontario.ca/-/media/documents/O/2017/on-marg-user-2011.pdf?la=en) (2017, accessed September 2, 2020).  
17  
18
- 19  
20 12. Matheson FI, Dunn JR, Smith KL, et al. Development of the Canadian Marginalization  
21 Index: a new tool for the study of inequality. *Can J Public Health* 2012; 103: S12-16.  
22  
23
- 24  
25 13. Hall RE, Porter J, Quan H, et al. Developing an adapted Charlson comorbidity index for  
26 ischemic stroke outcome studies. *BMC Health Serv Res* 2019; 19: 930.  
27  
28
- 29  
30 14. Jiménez Caballero PE, López Espuela F, Portilla Cuenca JC, et al. Charlson comorbidity  
31 index in ischemic stroke and intracerebral hemorrhage as predictor of mortality and functional  
32 outcome after 6 months. *J Stroke Cerebrovasc Dis* 2013; 22: e214-218.  
33  
34
- 35  
36 15. Tu K, Nieuwlaat R, Cheng SY, et al. Identifying patients with atrial fibrillation in  
37 administrative data. *Can J Cardiol* 2016; 32: 1561-1565.  
38  
39
- 40  
41 16. Agarwal S, Menon V and Jaber WA. Outcomes after acute ischemic stroke in the United  
42 States: does residential ZIP code matter? *J Am Heart Assoc* 2015; 4: e001629.  
43  
44
- 45  
46 17. Aslanyan S, Weir CJ, Lees KR, et al. Effect of area-based deprivation on the severity,  
47 subtype, and outcome of ischemic stroke. *Stroke* 2003; 34: 2623-2628.  
48  
49
- 50  
51 18. van den Bos GA, Smits JP, Westert GP, et al. Socioeconomic variations in the course of  
52 stroke: unequal health outcomes, equal care? *J Epidemiol Community Health* 2002; 56: 943-948.  
53  
54  
55  
56  
57  
58  
59  
60

- 1  
2  
3 19. Gregory PC and Han E. Disparities in postacute stroke rehabilitation disposition to acute  
4 inpatient rehabilitation vs. home: findings from the North Carolina Hospital Discharge Database.  
5  
6 *Am J Phys Med Rehabil* 2009; 88: 100-107.  
7  
8  
9  
10 20. Spieler JF, Lanoe JL and Amarenco P. Socioeconomic aspects of postacute care for  
11 patients with brain infarction in France. *Cerebrovasc Dis* 2002; 13: 132-141.  
12  
13  
14 21. Huang K, Khan N, Kwan A, et al. Socioeconomic status and care after stroke: results  
15 from the Registry of the Canadian Stroke Network. *Stroke* 2013; 44: 477-482.  
16  
17  
18 22. Sandel ME, Wang H, Terdiman J, et al. Disparities in stroke rehabilitation: results of a  
19 study in an integrated health system in northern California. *PM R* 2009; 1: 29-40.  
20  
21  
22 23. Freburger JK, Holmes GM, Ku LJ, et al. Disparities in postacute rehabilitation care for  
23 stroke: an analysis of the state inpatient databases. *Arch Phys Med Rehabil* 2011; 92: 1220-1229.  
24  
25  
26 24. Watanabe TK, Esquenazi A and Flanagan S. The transformation of the rehabilitation  
27 paradigm across the continuum of care. *PM R* 2018; 10: S264-S271.  
28  
29  
30  
31 25. American Academy of Physical Medicine and Rehabilitation. The post-acute continuum  
32 for stroke care, <https://www.aapmr.org/docs/default-source/career-center/aapmr-stroke-brochure-4-28-printhighres.pdf?sfvrsn=0#:~:text=Patients%20admitted%20to%20a%20SNF,a%20SNF%20is%2032.1%20days> (accessed October 17, 2020).  
33  
34  
35  
36  
37  
38  
39  
40  
41  
42 26. Hong I, Goodwin JS, Reistetter TA, et al. Comparison of functional status improvements  
43 among patients with stroke receiving postacute care in inpatient rehabilitation vs skilled nursing  
44 facilities. *JAMA Network Open* 2019; 2: e1916646.  
45  
46  
47  
48  
49 27. Nguyen TA, Page A, Aggarwal A, et al. Social determinants of discharge destination for  
50 patients after stroke with low admission FIM instrument scores. *Arch Phys Med Rehabil* 2007;  
51 88: 740-744.  
52  
53  
54  
55  
56  
57  
58  
59  
60

- 1  
2  
3 28. Nguyen VQ, PrvuBettger J, Guerrier T, et al. Factors associated with discharge to home  
4 versus discharge to institutional care after inpatient stroke rehabilitation. *Arch Phys Med Rehabil*  
5 2015; 96: 1297-1303.  
6  
7  
8  
9  
10 29. Tan WS, Heng BH, Chua KS, et al. Factors predicting inpatient rehabilitation length of  
11 stay of acute stroke patients in Singapore. *Arch Phys Med Rehabil* 2009; 90: 1202-1207.  
12  
13  
14 30. Meyer M., O'Callaghan C., Kelloway L., et al. The impact of moving to stroke  
15 rehabilitation best practices in Ontario, [https://www.corhealthontario.ca/The-impact-of-moving-](https://www.corhealthontario.ca/The-impact-of-moving-to-stroke-rehabilitation-best-practices-in-Ontario-OSN-Final-Report-Sept-14-2012.pdf)  
16 [to-stroke-rehabilitation-best-practices-in-Ontario-OSN-Final-Report-Sept-14-2012.pdf](https://www.corhealthontario.ca/The-impact-of-moving-to-stroke-rehabilitation-best-practices-in-Ontario-OSN-Final-Report-Sept-14-2012.pdf) (2012,  
17 accessed September 17, 2020).  
18  
19  
20  
21  
22  
23 31. John-Baptiste A, Naglie G, Tomlinson G, et al. The effect of English language  
24 proficiency on length of stay and in-hospital mortality. *J Gen Intern Med* 2004; 19: 221-228.  
25  
26  
27 32. Van Houtven CH, Oddone EZ and Weinberger M. Informal and formal care  
28 infrastructure and perceived need for caregiver training for frail US veterans referred to home  
29 and community-based services. *Chronic Illn* 2010; 6: 57-66.  
30  
31  
32  
33 33. Jaffee EG, Arora VM, Matthiesen MI, et al. Health literacy and hospital length of stay: an  
34 inpatient cohort study. *J Hosp Med* 2017; 12: 969-973.  
35  
36  
37  
38 34. Grundy E and Holt G. The socioeconomic status of older adults: how should we measure  
39 it in studies of health inequalities? *J Epidemiol Community Health* 2001; 55: 895-904.  
40  
41  
42  
43 35. Public Health Ontario. Summary measures of socioeconomic inequalities in health,  
44 [https://www.publichealthontario.ca/-/media/documents/S/2013/socioeconomic-inequality-](https://www.publichealthontario.ca/-/media/documents/S/2013/socioeconomic-inequality-measures.pdf?la=en)  
45 [measures.pdf?la=en](https://www.publichealthontario.ca/-/media/documents/S/2013/socioeconomic-inequality-measures.pdf?la=en) (2013, accessed October 18, 2020).  
46  
47  
48  
49  
50  
51  
52  
53  
54  
55  
56  
57  
58  
59  
60

1  
2  
3 **Tables**  
4

5 **Table 1. Baseline Characteristics by Material Deprivation Quintile**  
6  
7

| Factor                           | Deprivation Quintile |             |             |             |                    | Total<br>N=18,736 | P-value |
|----------------------------------|----------------------|-------------|-------------|-------------|--------------------|-------------------|---------|
|                                  | 1 (least)<br>N=3068  | 2<br>N=3411 | 3<br>N=3723 | 4<br>N=3952 | 5 (most)<br>N=4582 |                   |         |
| Age in years at admission, n (%) |                      |             |             |             |                    |                   |         |
| 19-49                            | 182 (5.9)            | 193 (5.7)   | 209 (5.6)   | 227 (5.7)   | 333 (7.3)          | 1144 (6.1)        | <0.001  |
| 50-59                            | 332 (10.8)           | 405 (11.9)  | 440 (11.8)  | 482 (12.2)  | 767 (16.7)         | 2426 (12.9)       |         |
| 60-69                            | 612 (19.9)           | 692 (20.3)  | 829 (22.3)  | 906 (22.9)  | 1060 (23.1)        | 4099 (21.9)       |         |
| 70-79                            | 830 (27.1)           | 944 (27.7)  | 1002 (26.9) | 1044 (26.4) | 1153 (25.2)        | 4973 (26.5)       |         |
| 80-89                            | 909 (29.6)           | 987 (28.9)  | 1017 (27.3) | 1081 (27.4) | 1040 (22.7)        | 5034 (26.9)       |         |
| 90+                              | 203 (6.6)            | 190 (5.6)   | 226 (6.1)   | 212 (5.4)   | 229 (5.0)          | 1060 (5.7)        |         |
| Female, n (%)                    | 1352 (44.1)          | 1574 (46.1) | 1730 (46.5) | 1858 (47.0) | 2100 (45.8)        | 8614 (46.0)       | 0.155   |
| Stroke type, n (%)               |                      |             |             |             |                    |                   |         |
| Ischemic                         | 2637 (86.0)          | 2912 (85.4) | 3230 (86.8) | 3449 (87.3) | 4005 (87.4)        | 16233 (86.6)      | 0.045   |
| Hemorrhagic                      | 431 (14.0)           | 499 (14.6)  | 493 (13.2)  | 503 (12.7)  | 577 (12.6)         | 2503 (13.4)       |         |

|                                                                                         |             |             |             |             |             |              |        |
|-----------------------------------------------------------------------------------------|-------------|-------------|-------------|-------------|-------------|--------------|--------|
| Proportion of ischemic stroke patients who received tissue plasminogen activator, n (%) | 417 (15.8)  | 447 (15.4)  | 502 (15.5)  | 461 (13.4)  | 551 (13.8)  | 2378 (14.6)  | 0.011  |
| Proportion treated on an acute stroke unit, n (%)                                       | 1509 (49.2) | 1627 (47.7) | 1738 (46.7) | 1792 (45.3) | 2148 (46.9) | 8814 (47.0)  | 0.026  |
| Acute care length of stay, mean (SD)                                                    | 12.2 (13.4) | 12.2 (12.3) | 11.8 (12.8) | 12.4 (14.3) | 12.4 (13.7) | 12.2 (13.4)  | 0.235  |
| Charlson comorbidity index, n (%)                                                       |             |             |             |             |             |              |        |
| 0 or 1                                                                                  | 1416 (46.2) | 1512 (44.3) | 1652 (44.4) | 1660 (42.0) | 1810 (39.5) | 8050 (43.0)  | <0.001 |
| ≥ 2                                                                                     | 1652 (53.8) | 1899 (55.7) | 2071 (55.6) | 2292 (58.0) | 2772 (60.5) | 10686 (57.0) |        |
| Atrial fibrillation, n (%)                                                              | 478 (15.6)  | 499 (14.6)  | 549 (14.7)  | 611 (15.5)  | 550 (12.0)  | 2687 (14.3)  | <0.001 |
| Rural, n (%)                                                                            | 244 (8.0)   | 427 (12.5)  | 585 (15.7)  | 611 (15.5)  | 380 (8.3)   | 2247 (12.0)  | <0.001 |
| Admit living arrangement, n (%)                                                         |             |             |             |             |             |              |        |
| Alone                                                                                   | 735 (24.0)  | 847 (24.8)  | 939 (25.2)  | 1119 (28.3) | 1601 (34.9) | 5241 (28.0)  | <0.001 |
| Not alone                                                                               | 2333 (76.0) | 2564 (75.2) | 2784 (74.8) | 2833 (71.7) | 2981 (65.1) | 13495 (72.0) |        |
| Rehab admit Functional Independence Measure, mean (SD)                                  |             |             |             |             |             |              |        |

|                                                        |             |             |             |             |             |              |       |
|--------------------------------------------------------|-------------|-------------|-------------|-------------|-------------|--------------|-------|
| Motor                                                  | 47.4 (19.9) | 46.1 (19.6) | 46.1 (19.8) | 46.8 (19.6) | 47.1 (19.5) | 46.7 (19.7)  | 0.021 |
| Cognitive                                              | 24.2 (7.0)  | 24.3 (7.0)  | 24.4 (7.0)  | 24.5 (7.0)  | 24.2 (7.0)  | 24.3 (7.0)   | 0.42  |
| Total                                                  | 71.6 (23.2) | 70.5 (23.0) | 70.5 (23.2) | 71.2 (23.1) | 71.3 (22.8) | 71.0 (23.1)  | 0.151 |
| Total admission Functional Independence Measure, n (%) |             |             |             |             |             |              |       |
| >80                                                    | 1127 (36.8) | 1176 (34.6) | 1327 (35.8) | 1419 (36.0) | 1668 (36.5) | 6717 (36.0)  |       |
| 40 – 80                                                | 1640 (53.6) | 1850 (54.5) | 1982 (53.5) | 2133 (54.1) | 2431 (53.3) | 10036 (53.8) | 0.512 |
| <40                                                    | 293 (9.6)   | 368 (10.8)  | 396 (10.7)  | 389 (9.9)   | 465 (10.2)  | 1911 (10.2)  |       |
| ≥1 Service interruptions, n (%)                        | 184 (6.0)   | 202 (5.9)   | 208 (5.6)   | 215 (5.4)   | 264 (5.8)   | 1073 (5.7)   | 0.844 |
| ≥1 Readmissions to acute, n (%)                        | 107 (3.5)   | 128 (3.8)   | 142 (3.8)   | 101 (2.6)   | 156 (3.4)   | 634 (3.4)    | 0.018 |

1  
2  
3  
4  
5  
6  
7  
8  
9  
10  
11  
12  
13  
14  
15  
16  
17  
18  
19  
20  
21  
22  
23  
24  
25  
26  
27  
28  
29  
30  
31  
32  
33  
34  
35  
36  
37  
38  
39  
40  
41  
42  
43  
44  
45  
46  
47

**Table 2. Proportion Discharged to Long-term Care and Length of Stay by Deprivation Quintile (N=18,736)**

| Factor                             | Deprivation Quintile |                  |                  |                  |                  | P-value |
|------------------------------------|----------------------|------------------|------------------|------------------|------------------|---------|
|                                    | 1 (least)            | 2                | 3                | 4                | 5 (most)         |         |
| Discharge to long-term care, n (%) | 242 (7.9)            | 243 (7.1)        | 303 (8.1)        | 315 (8.0)        | 394 (8.6)        | 0.20    |
| Length of stay                     |                      |                  |                  |                  |                  |         |
| mean (SD)                          | 31.0 (19.4)          | 31.4 (20.1)      | 31.6 (20.4)      | 32.1 (21.3)      | 32.7 (21.3)      | 0.004*  |
| median (IQR)                       | 28.0 (16.0-41.0)     | 28.0 (16.0-42.0) | 28.0 (16.0-42.0) | 28.0 (16.0-42.0) | 28.0 (17.0-42.0) | 0.09†   |

\* ANOVA

† Kruskal-Wallis



**Table 3. Association of Material Deprivation and Discharge Destination Following Inpatient Rehabilitation (N=18,736)**

| Discharge destination, n (%)   | Deprivation Quintile |             |             |             |             | P-value |
|--------------------------------|----------------------|-------------|-------------|-------------|-------------|---------|
|                                | 1 (least)            | 2           | 3           | 4           | 5 (most)    |         |
| Long-term care                 | 242 (7.9)            | 243 (7.1)   | 303 (8.1)   | 315 (8.0)   | 394 (8.6)   | 0.001   |
| Home with paid health services | 1454 (47.4)          | 1684 (49.4) | 1810 (48.6) | 1933 (48.9) | 2173 (47.4) |         |
| Home without health services   | 917 (29.9)           | 945 (27.7)  | 1011 (27.2) | 1126 (28.5) | 1380 (30.1) |         |
| Assisted living                | 210 (6.8)            | 212 (6.2)   | 236 (6.3)   | 200 (5.1)   | 222 (4.9)   |         |
| Acute care                     | 144 (4.7)            | 190 (5.6)   | 214 (5.8)   | 234 (5.9)   | 249 (5.4)   |         |
| Other / unknown                | 101 (3.3)            | 137 (4.0)   | 149 (4.0)   | 144 (3.6)   | 164 (3.6)   |         |

**Table 4. Adjusted Odds Ratio of Direct Discharge to Long-term Care from Inpatient Rehabilitation (N=18,664)\***

| Characteristic                              | OR<br>(95% CI)            |
|---------------------------------------------|---------------------------|
| Material deprivation quintile               |                           |
| Quintile 1 (least)                          | Ref                       |
| Quintile 2                                  | 0.86 (0.70 – 1.04)        |
| Quintile 3                                  | 1.02 (0.84 – 1.23)        |
| Quintile 4                                  | 1.00 (0.83 – 1.21)        |
| Quintile 5 (most)                           | 1.07 (0.89 – 1.28)        |
| Female                                      | 0.92 (0.82 – 1.04)        |
| Age in years at admission                   |                           |
| 19-49                                       | Ref                       |
| 50-59                                       | 1.46 (0.99 – 2.15)        |
| 60-69                                       | <b>1.79 (1.25 – 2.58)</b> |
| 70-79                                       | <b>1.94 (1.35 – 2.77)</b> |
| 80-89                                       | <b>2.09 (1.46 – 2.99)</b> |
| 90+                                         | <b>2.46 (1.66 – 3.65)</b> |
| Proportion admitted to an acute stroke unit | <b>1.24 (1.11 – 1.39)</b> |
| Acute care length of stay                   | <b>1.00 (1.00 – 1.01)</b> |
| Charlson comorbidity index $\geq 2$         | <b>1.17 (1.04 – 1.32)</b> |
| History of atrial fibrillation              | 1.05 (0.90 – 1.22)        |
| Rural                                       | <b>0.54 (0.44 – 0.66)</b> |

|                                                 |                           |
|-------------------------------------------------|---------------------------|
| Living alone pre-admission                      | <b>2.03 (1.79 – 2.29)</b> |
| Total admission Functional Independence Measure | <b>0.95 (0.94 – 0.95)</b> |
| ≥1 service interruptions                        | 0.85 (0.69 – 1.05)        |

\*72 observations deleted due to missing variables

† c = 0.826

Confidential

**Table 5. Adjusted Relative Risk for Increasing Length of Stay (N=18,664)\***

| Characteristic                                  | Adjusted RR<br>(95% CI)   |
|-------------------------------------------------|---------------------------|
| Material deprivation quintile                   |                           |
| Quintile 1 (least)                              | Ref                       |
| Quintile 2                                      | 0.99 (0.96 – 1.01)        |
| Quintile 3                                      | 1.00 (0.97 – 1.02)        |
| Quintile 4                                      | 1.02 (0.99 – 1.04)        |
| Quintile 5 (most)                               | <b>1.03 (1.01 – 1.06)</b> |
| Acute care length of stay                       | <b>1.00 (1.00 – 1.00)</b> |
| Ischemic stroke                                 | <b>0.97 (0.95 – 1.00)</b> |
| Proportion admitted to an acute stroke unit     | <b>0.92 (0.91 – 0.94)</b> |
| Total admission Functional Independence Measure | <b>0.98 (0.98 – 0.98)</b> |
| Charlson comorbidity index $\geq 2$             | <b>1.02 (1.00 – 1.03)</b> |
| Pre-admission living arrangement                |                           |
| Not alone                                       | Ref                       |
| Alone                                           | <b>1.12 (1.10 – 1.14)</b> |
| $\geq 1$ service interruptions                  | <b>1.34 (1.29 – 1.38)</b> |

\* 72 observations deleted due to missing values

† Deviance = 1.04
